# Supplementary material
Source: PubMed Central journal article supplement (PMC2655392)

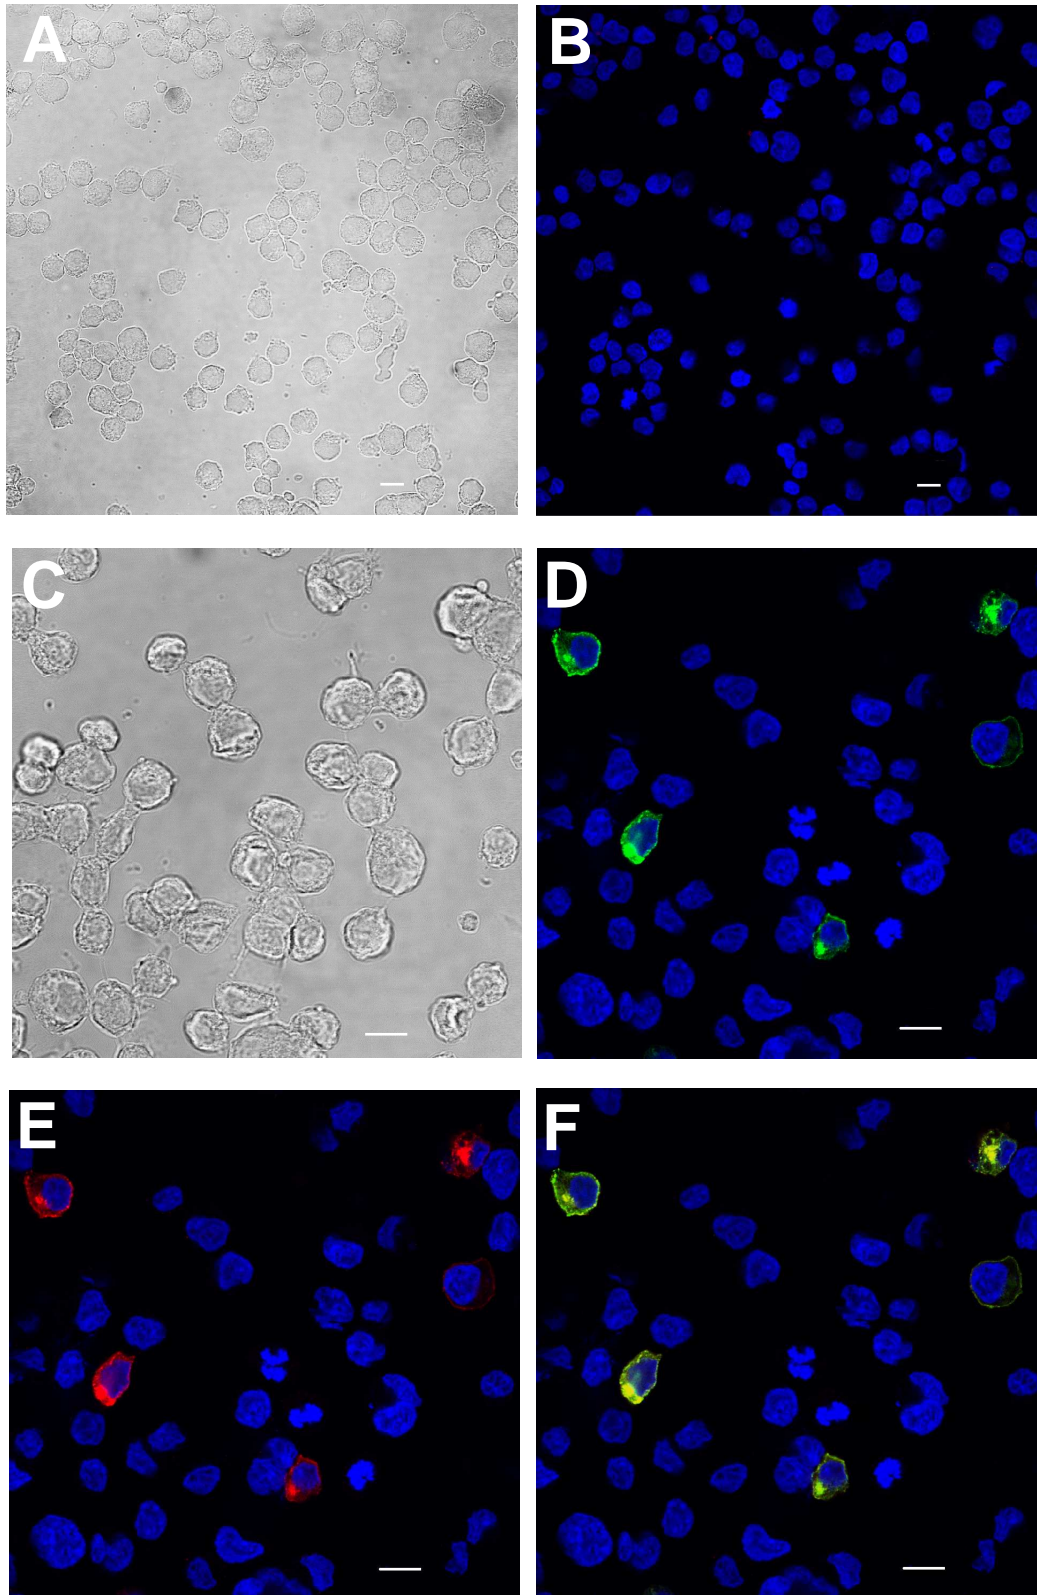

Gomis et al. Fig. S1

Supplement: tjp0586-5633-SD1.pdf [file tjp0586-5633-SD1.pdf]

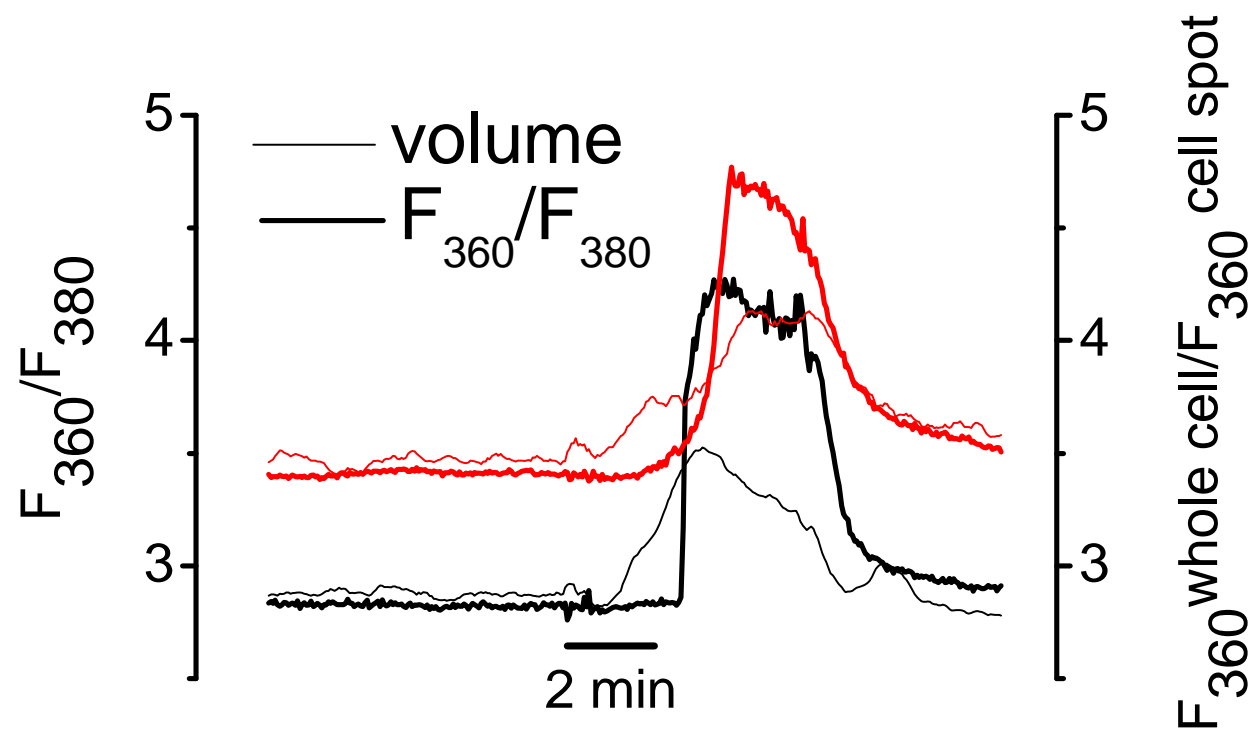

Gomis et al. Fig. S2

Supplement: tjp0586-5633-SD2.pdf [file tjp0586-5633-SD2.pdf]
